1 High-throughput sequencing analysis of bacterial diversity in raw and pasteurized

2 goat milk

3 Feng Huang <sup>a1</sup>, Siqu Liu <sup>a1</sup>, Xiaokang Zhou <sup>a</sup>, Pengfei Wang <sup>a</sup>, Rengchun He <sup>b</sup>, Zhiyang

4 Zhou <sup>b</sup> and Caixia Zou <sup>a\*</sup>

5

6 <sup>a</sup> College of Animal Science and Technology, Guangxi University, Nanning, Guangxi,

7 530004, China

8 <sup>b</sup> The Animal Husbandry Research Institute of Guangxi Zhuang Autonomous Region,

9 Nanning, Guangxi, 530001, China

10

11 Running title: bacterial diversity in goat milk

12

13 \*Corresponding author.

14 Caixia Zou, E-mail address: caixiazou2002@hotmail.com, College of Animal Science

15 and Technology, Guangxi University, Nanning, Guangxi, 530004, China;

16 Feng Huang and Siqu Liu contributed equally to this work and are co-authors.

17

18

19

20

21

22

## 23 **Abstract**

24 The aim of this study was to evaluate the microbial composition of both raw and  
25 pasteurized goat milk using high-throughput DNA sequencing. This analysis revealed  
26 that the dominant phylum found in the raw milk was *Proteobacteria*, and the  
27 dominant genus was *Kluyvera*; *Proteobacteria* and *Kluyvera* constituted up to 67.66%  
28 and 28.85% of the total bacteria population, respectively. The microorganisms in goat  
29 milk predominantly consist of Gram-negative bacteria. Notably, *Akkermansia* and  
30 *Faecalibacterium* were identified in goat milk for the first time. In addition, the  
31 results also indicate that some bacteria in pasteurized goat milk may exist in a viable  
32 but nonculturable (VBNC) state. This study provides a theoretical basis that may aid  
33 the community in better understanding bacterial diversity in goat milk. The results of  
34 this study will help us to improve the quality and safety of goat milk.

35 **Importance** The microbial diversity in goat milk and pasteurized goat milk at  
36 different refrigeration stages was described. Several bacterial species that have not  
37 previously been reported in goat milk were identified, including many VBNC bacteria.  
38 The findings provided the necessary microbial information for quality and safety of  
39 goat milk and dairy products.

40 **Key words:** Goat milk, high-throughput sequencing, bacterial diversity, cold storage

## 41 **Introduction**

42 Dairy products play an important role in the daily diet of humans with  
43 multifarious products including milk, yoghurt and cheese available for consumption.  
44 Goat milk contains an abundance of nutrients that are easily digested and absorbed

45 (Park et al., 2007). In recent years, there has been a growing interest in goat milk  
46 because of its medical and nutritional benefits, especially for people who are allergic  
47 to cow milk. Goat milk also contains many beneficial bacteria, especially lactic acid  
48 bacteria (LAB), which have been touted as suitable effectors of goat milk  
49 fermentation reactions (Fernanda et al., 2016; García et al., 2014). However, different  
50 species of lactic acid bacteria have different functions and these species are known to  
51 play decisive roles in the quality of dairy products (Montel et al., 2014). It is hoped  
52 that future research investigating the composition of lactic acid bacterial populations  
53 in goat milk can help us to better understand the fermentation of dairy products.

54 In general, pasteurization uses the application of heat to reduce the microbial  
55 load in raw milk. However, several studies have reported that pasteurized milk can  
56 only be stored for 3 to 10 days at refrigerated storage conditions (Petrus et al., 2010;  
57 Fan et al., 2016). A previous study by Fonseca et al. (2013) revealed that heat-treated  
58 goat milk should not be kept in cold storage for more than 3 days (4°C); refrigeration  
59 for longer than 3 days can affect the shelf-life of milk powder. Thermophilic bacteria  
60 are considered to be ubiquitous microorganisms in pasteurized milk (Ternström et al.,  
61 1993). In addition, plate-counting methods have been used to show that the  
62 prevalence of psychrophilic bacteria in pasteurized milk increases during refrigerated  
63 storage and these bacteria can produce heat-resistant proteolytic enzymes and lipases  
64 (Meunier-Goddik, L and Sandra, S. 2011, Angelidis et al., 2016), which can lead to  
65 reduced dairy product and milk shelf-lives (Doyle et al., 2017). Moreover, it is  
66 difficult to observe some of the changes that occur in relative bacterial abundances

67 due to difficulties associated with cultivation using plate-counting methods during  
68 cold storage.

69 From the perspective of food quality and storage time, identification of the  
70 microbial populations in goat milk is necessary for the safety of milk products. It is  
71 difficult to determine the entire bacterial composition of milk using culture-dependent  
72 methods; this is especially true for bacteria that exist in a VBNC state  
73 (Paszyńska-Wesołowska and Bartoszcze, 2009; Kibbee and Örmeci, 2017). Recent,  
74 high-throughput sequencing strategies have made it possible to identify many of the  
75 afore-mentioned bacteria at subdominant levels. These methodologies have been used  
76 to detect microorganisms in dairy products thereby helping us to better understand the  
77 diversity and dynamics of native microbial populations. Only a limited number of  
78 studies have reported the bacterial diversity of goat milk in China. Moreover, the  
79 composition and associated co-occurrences of microbial populations in pasteurized  
80 goat milk during cold storage (about 4°C) have not been investigated. In the current  
81 study, the primary aim was to determine the bacterial diversity in raw goat milk as  
82 well as in pasteurized goat milk at different stages of refrigeration using  
83 high-throughput sequencing. This study assessed bacterial diversity in goat milk and  
84 provides a basis for further analysis of goat milk.

## 85 **Materials and methods**

### 86 **Sample collection**

87 The goat milk samples were obtained from a goat farm with 200 Guanzhong  
88 goats. The goat farm is located at the Animal Husbandry Research Institute of

89 Guangxi Zhuang Autonomous Region in China. All animal experiments were  
90 performed in line with experimental animal administration regulations of Guangxi  
91 University. All goats were fed uniformly (peanut vine, elephant grass and 2 kg of  
92 complete feed, twice a day); the feed did not contain antibiotics, and all breasts of  
93 goats were healthy throughout the entire lactation period. All goat milk samples were  
94 collected during the fifth month of lactation. Milk samples were collected after teat  
95 ends had been disinfected with 70% ethyl alcohol. Raw goat milk was immediately  
96 placed into sterilized cone bottles; the samples were subsequently placed in an ice box  
97 until they were analyzed in the laboratory. The SCC of samples was below 200,000  
98 cells/mL. The average fat and protein contents in raw goat milk were 3.87 g/100 mL  
99 and 3.16 g/100 mL, respectively. Raw goat milk was sterilized by pasteurization (at  
100 72°C for 15 s), and the pasteurized goat milk samples were immediately placed into  
101 an ice box cooling to 4°C. Next, the pasteurized milk samples were stored at 4°C for 5  
102 and 10 d before freezing at -80°C. To facilitate DNA extraction, the afore-mentioned  
103 goat milk samples were defrosted at 4°C.

#### 104 **DNA extraction**

105 Good quality DNA is important for valid analysis of goat milk microbial diversity.  
106 Goat milk samples (20 mL) were concentrated by centrifugation for 10 min at 12,000  
107  $\times g$  at 4°C. The aqueous and fatty layers were removed and discarded. Cell pellets  
108 were washed with 0.8% NaCl solution and centrifuged at 12,000  $\times g$  for 10 min at  
109 4°C. Total genomic DNA was extracted using the food DNA Kit according to the  
110 manufacturer's instructions. The purity and yield of the extracted DNA were

111 determined with a Qubit® dsDNA BR Assay Kit in accordance with the  
112 manufacturer's instructions; the integrity of the extracted DNA was determined by  
113 agarose gel electrophoresis (using a 1% agarose gel).

#### 114 **High-Throughput Sequencing and Bioinformatics Analysis**

115 The afore-mentioned DNA extracts were sequenced following amplification of the V3  
116 and V4 regions of 16S rRNA genes using the universal forward primer 338F  
117 (5'-ACTCCTACGGGAGGCAGCAG-3') and the universal reverse primer 806R  
118 (5'-GGACTACHVGGGTWTCTAAT-3'). The reverse primer contained a set 6-bp  
119 barcode. Genomic DNA samples (30 ng) and corresponding fusion primers were used  
120 to perform the PCRs. The PCRs were performed as follows: 95°C for 3 min followed  
121 by 30 cycles of 95°C for 30 s, 55°C for 30 s, and 72°C for 45 s; a final extension step  
122 of 72°C for 10 min was also performed. Amplified PCR products were purified with  
123 Agencourt AMPure XP magnetic beads and dissolution in Elution Buffer was  
124 performed to construct a DNA Library. The concentration and range of the library  
125 were analyzed using an Agilent 2100 Bioanalyser according to the manufacturer's  
126 instructions. The qualified library was sequenced using an Illumina HiSeq 2500  
127 platform (Fadrosh et al., 2014), and the sequencing type was PE 300. Clean data were  
128 obtained by processing the raw data using the Windows discard low quality approach,  
129 while low-quality data were removed. According to the barcode and primers, the  
130 allowable number of mismatches between barcode sequences and reads was 0 bp.  
131 Paired-end reads were assembled using FLASH (Magoc and Salzbert, 2011) software  
132 to generate the raw tags. The effective tags were clustered using USEARCH (Edgar,

133 2013) software to generate operational taxonomic units (OTUs) based on 97%  
134 threshold identity. The taxonomic annotation was performed using the RDP classifier  
135 (Wang et al., 2007) at the phylum and genus level. Alpha diversity was analyzed using  
136 Chao1 richness; Shannon, observed species and Good's coverage indices were  
137 calculated by mothur (Schloss et al., 2009) software. The high-throughput sequencing  
138 data generated were deposited in the NCBI database (Accession number: SRP  
139 219141).

## 140 **Results**

### 141 **High-Throughput Sequencing of Amplicons**

142 Using high-throughput sequencing, a total of 1,199,746 raw reads were obtained from  
143 9 samples; after filtering, 1,127,473 clean reads were generated. The rarefaction curve  
144 (Figure 1) revealed that sequencing data resulted in sufficient coverage, suggesting  
145 that the data were reliable for further analyses. The rank curve (Figure 1) showed that  
146 the abundance in the samples decreased during prolonged cold storage. The Chao1,  
147 Simpson, observed species, Shannon and ACE diversity indices of each group are  
148 shown in Table 1.

### 149 **Bacterial composition of raw goat milk**

150 The bacterial diversity of the raw goat milk was defined at both phylum and genus  
151 levels by high-throughput sequencing (Table 2, Figure 2). The sequences  
152 corresponded to 5 distinct phyla: *Proteobacteria*, *Firmicutes*, *Deinococcus-Thermus*,  
153 *Bacteroidetes* and *Actinobacteria* were detected in the raw goat milk. The results  
154 revealed that phylum *Proteobacteria* was the dominant phylum in raw goat milk

155 samples, with more than 67.66% of the total population consisting of *Proteobacteria*  
156 (Table 2, Figure 2A). At the family level, *Enterobacteriaceae* was the predominant  
157 family, accounting for 49.29% of all bacteria (data not shown). Genus *Kluyvera* was  
158 the dominant genus in raw goat milk, representing approximately 28.85% of the total  
159 population (Table 2, Figure 2B).

160 The most abundant genera *Kluyvera*, *Aquabacterium*, *Pseudomonas*, *Burkholderia*,  
161 *Thermus* and *Acinetobacter* detected in goat milk were Gram-negative. Indeed,  
162 Gram-negative bacteria accounted for more than 82% of the total population in raw  
163 goat milk (Figure 4).

164 We also identified several bacterial genera that had not previously been reported in  
165 raw goat milk. These genera included *Faecalibacterium* and *Akkermansia*.

166 In this study, the hygienic safety status of raw goat milk was also assessed. Several  
167 pathogens, including *Shigella*, *Staphylococcus* and *Serratia* were identified in the raw  
168 milk. Probiotics including *Lactobacillus*, *Lactococcus*, *Bifidobacterium*, *Weissella* and  
169 *Enterococcus* were also identified. This analysis revealed the identity of some LAB at  
170 the species level: *Lactobacillus\_helveticus* (0.07%), *Lactobacillus\_gasseri* (0.009%),  
171 *Lactobacillus\_xiangfangensis* (0.005%), *Lactobacillus\_casei* (0.01%),  
172 *Lactobacillus\_iners* (0.009%), *Lactobacillus\_pobuzihii* (0.01%),  
173 *Lactobacillus\_paralimentarius* (0.01%), *Lactobacillus\_ruminis* (0.001%),  
174 *Lactobacillus\_yersmoldensis* (0.0003%), *Lactobacillus\_delbrueckii* (0.004%),  
175 *Lactococcus\_lactis* (0.25%), *Lactococcus\_chungangensis* (0.01%),  
176 *Bifidobacterium\_merycicum* (0.006%), *Bifidobacterium\_pseudolongum* (0.02%),



177 *Bifidobacterium\_psydraerophilum* (0.01%), *Weissella\_paramesenteroides* (0.04%),  
178 and *Enterococcus\_faecalis* (0.01%). These results are important for the future  
179 production of probiotic milks.

#### 180 **Bacterial composition of pasteurized milk**

181 The bacterial community of pasteurized goat milk was analyzed at the genus level at  
182 different stages of 4°C storage (Figure 3). At the phylum level, there was no  
183 significant change in bacterial diversity (data not shown). In this current study,  
184 taxonomic analysis revealed that, at the genus level, the predominate genera in  
185 pasteurized goat milk stored for 5 d was similar to that for raw goat milk (Figure 3).  
186 The relative abundance of *Acinetobacter* in pasteurized goat milk was similar to that  
187 of raw goat milk (3.78 vs 4.08%) after 5 d of storage. Following 10 d of storage, an  
188 increase in the relative abundance of *Acinetobacter* was observed in pasteurized goat  
189 milk (3.78 vs 10.00%); *Acinetobacter* became the dominant genus at d 10 (Figure 3).  
190 A relatively low abundance of *Meiothermus* was observed in raw goat milk, whereas  
191 the *Meiothermus* population in pasteurized goat milk appeared to increase gradually  
192 during cold storage (0.005 vs 8.68%). Similar results were observed for  
193 *Sphingomonas* and *Staphylococcus* (Figure 3). By contrast, the proportion of other  
194 genera (those present in pasteurized goat milk in addition to the afore-mentioned  
195 genera) gradually decreased in pasteurized goat milk stored between 5 d and 10 d  
196 (Figure 3). Furthermore, the prevalence of Gram-negative, obligate aerobes  
197 significantly increased following storage for 5 d to 10 d (20.49 vs 35.90%, Figure 4).  
198 Correlation between the microbial genus composition of goat milk during cold storage

199 To better understand the abundances and relationships between dominant species  
200 (more than 1% of total bacterial composition) during cold storage, a Spearman's  
201 correlation heatmap was generated for the dominant species (Figure 5). The results  
202 revealed that *Acinetobacter\_pittii* was positively correlated with *Burkholderia*  
203 *multivorans* (R=0.67, P=0.04). *Acinetobacter lwoffii* was positively correlated with  
204 *Sphingomonas oligophenolica* (R=0.85, P=0.003) and *Meiothermus silvanus* (R=0.76,  
205 P=0.016). Meanwhile, *Acinetobacter lwoffii* and *Sphingomonas oligophenolica* were  
206 negatively correlated with *Burkholderia multivorans* (R=0.88, P=0.001 and R=0.86,  
207 P=0.002, respectively). *Geobacillus stearothermophilus* was positively correlated  
208 with *Aquabacterium parvum* (R=0.83, P=0.005).

## 209 Discussion

210 In this current study, the bacterial diversity of raw goat milk and the effect of cold  
211 storage on the bacterial diversity of pasteurized goat milk from Guangxi, China was  
212 investigated using a high-throughput sequencing strategy. The results of this analysis  
213 revealed that 5 distinct phyla (i.e., *Proteobacteria*, *Firmicutes*, *Deinococcus-Thermus*,  
214 *Bacteroidetes* and *Actinobacteria*) and 4 distinct genera were present (i.e., *Kluyvera*,  
215 *Geobacillus*, *Thermus* and *Pseudomonas*) in the raw milk of goats. Notably, the  
216 genera, *Akkermansia* and *Faecalibacterium*, were identified in raw goat milk for the  
217 first time. Furthermore, following prolonged storage under refrigerated conditions, the  
218 dominant genera were *Geobacillus* and *Kluyvera* after 5 d of storage while *Kluyvera*,  
219 *Acinetobacter* and *Meiothermus* were the dominant genera after 10 d.

220 In this study, the less prevalent genera in goat milk constituted a significant proportion

221 of the total bacterial population; this result is similar to results published in other  
222 reports (Kable et al., 2016; Quigley et al., 2013).

223 The most abundant phyla observed in raw goat milk were similar to those published in  
224 previous studies (Zhang et al., 2017). Conversely, the predominant genera observed in  
225 raw goat milk in this study differed from those identified in other studies. McInnis et  
226 al. (2015) reported that the most abundant genera in raw goat milk were *Micrococcus*,  
227 *Rhodococcus*, *Stenotrophomonas*, *Pseudomonas* and *Phyllobacterium*; these results  
228 were not consistent with our research. Meanwhile, previous research revealed that the  
229 genus *Pseudomonas* was abundant in goat milk (Scatamburlo et al., 2015). In this  
230 current study, genus *Kluyvera* constituted a significant proportion of the total bacterial  
231 population in raw goat milk. These differences in the associated abundances could be  
232 related to many factors, including lactation stage, feed, weather environment, health  
233 of the animal, and farm management practices (Callon et al., 2007).

234 In our study, the predominant genera (i.e., *Kluyvera*, *Thermus*, *Aquabacterium*,  
235 *Pseudomonas*, *Burkholderia* and *Acinetobacter*) observed in raw goat milk were  
236 Gram-negative bacteria. Dalmasso et al. (2017) studied the bacterial diversity of  
237 donkey milk and reported that, similar to our study, the dominant genera  
238 *Pseudomonas*, *Ralstonia*, *Cupriavidus*, *Acinetobacter*, *Citrobacter* and  
239 *Sphingobacterium* were also Gram-negative bacteria. Gram-negative bacteria are  
240 usually considered a major cause of milk spoilage and poor hygiene (Ercolini et al.,  
241 2009; Neugebauer and Gilliland, 2005). Nevertheless, some Gram-negative bacteria  
242 may play a positive role in the sensory characteristics of milk (Delbès-Paus et al.,

243 2012). Larpin-Laborde et al. (2011) also reported that some Gram-negative bacteria  
244 could have potential applications in cheese-manufacturing technologies. However,  
245 little is currently known about the role of Gram-negative bacteria in associated  
246 manufacturing strategies. Hence, the role of Gram-negative bacteria in milk merits  
247 further study.

248 The genera *Thermus*, *Burkholderia* and *Aquabacterium* are usually found in hot  
249 springs, soil, and water, and are therefore considered environmental microorganisms.  
250 In addition, the genera *Akkermansia* and *Faecalibacterium* are generally considered  
251 gut microbes. *Akkermansia* is considered to be a potentially protective intestinal  
252 bacterium (Arias et al., 2017). *Akkermansia* is associated not only with the intestinal  
253 health of obese and diabetic individuals but is also known to promote the therapeutic  
254 effects of tumor PD-1 (Reunanen et al., 2015; Routy et al., 2018). In a recent study,  
255 *Akkermansia* was shown to promote intestinal mucosal immunity homeostasis  
256 (Ottman et al., 2017). The species *Faecalibacterium* could play an important role in  
257 gut homeostasis, and has been shown to exhibit anti-inflammatory activity (Sokol et  
258 al., 2009). The effects of these microbes in goat milk on human health remain to be  
259 elucidated. Nevertheless, this study will provide us with a platform to identify new  
260 functional microorganisms that have not yet been discovered.

261 Our study also revealed high bacterial diversity in pasteurized goat milk. The  
262 rarefaction curve and rank abundance curve (Figure 1) confirmed that the bacterial  
263 diversity of pasteurized goat milk decreased during cold storage.

264 It is widely perceived that pasteurization is sufficient to eliminate the threat of

265 psychrophilic bacteria. Psychrophilic bacteria exhibit proteolytic and lipolytic  
266 enzymatic activities, and therefore can reduce the shelf-life of milk products.  
267 However, the study revealed that the prevalence of *Acinetobacter* can increase during  
268 5 to 10 d of refrigeration (Figure 3). The authors speculate that some bacteria (i.e.,  
269 *Acinetobacter*) that are supposed to be eliminated by pasteurization are likely to  
270 survive and may be in a damaged and/or VBNC state. *Acinetobacter* and  
271 *Pseudomonas* are psychrophilic bacteria which increase in prevalence during  
272 refrigeration. Our study revealed that the genus *Acinetobacter* increased in prevalence  
273 following storage for 10 d. This finding is similar results published by Raats et al.  
274 (2011) where *Acinetobacter* was the predominant genus after cold incubation for 54 h.  
275 Conversely, the genus *Pseudomonas* gradually decreased during prolonged storage.  
276 This result differs from the results of a study published by Porcellato et al (2018)  
277 where genus *Pseudomonas* was abundant following cold storage.  
278 Researchers have suggested that the microbial composition of milk changes and  
279 affects the quality of milk during cold storage (De Jonghe et al., 2011; von Neubeck et  
280 al., 2015). The correlation analysis revealed the relationships among the dominant  
281 bacteria in pasteurized goat milk during refrigerated storage (Figure 5); this analysis  
282 indicated that there were different interdependence relationships among the  
283 microorganisms in goat milk. During prolonged cold storage, *Acinetobacter*  
284 populations play a key role in maintaining the interrelationships between  
285 microorganisms. The existence of dominant species leads to a negative correlation  
286 between microorganisms in goat milk (Figure 5).

287 Our culture-independent analyses revealed a low proportion of *Sphingomonas* and  
288 *Meiothermus* in raw goat milk, whereas a significantly greater proportion of  
289 *Sphingomonas* and *Meiothermus* were observed in pasteurized goat milk during cold  
290 storage (Figure 3). *Sphingomonas* spp. are phylogenetically related to *Pseudomonas*  
291 spp., and represent a new type of microbial resource. A Spearman's correlation heat  
292 map showed that *Sphingomonas* and *Meiothermus* were positively correlated with  
293 *Acinetobacter* spp. (Figure 5), and these bacteria increase during cold storage.  
294 However, the effect of these microbes in pasteurized goat milk on the hygienic quality  
295 and shelf-life of goat milk is still unknown.  
296 It is generally considered that LAB are the dominant bacteria in milk from several  
297 animals. The relatively low abundance of LAB observed in this study is consistent  
298 with a study published by Cavallarin et al. (2015). In this study, members of the  
299 *Lactococcus* (0.26%) genus were more prevalent than those of the *Lactobacillus*  
300 genus (0.14%); this result was not consistent with the Setyawardani et al. (2011)  
301 report. Some LAB in raw goat milk were detected at the species level. LAB in milk  
302 have shown potential in the production of natural antimicrobials for the improvement  
303 of human and animal health (Quigley et al., 2013). Recently, Perna et al. (2015)  
304 observed that a LAB strain isolated from cow's milk had a positive effect on the  
305 fermentation of milk. In another study, Jeronimo-Ceneviva et al. (2014) isolated a  
306 new probiotic bacterium from dairy products produced from buffalo milk. Previous  
307 studies have shown that goat milk can treat patients with milk allergies and  
308 gastrointestinal diseases (Haenlein et al., 2004). Our results provide a theoretical basis

309 for the isolation of beneficial bacteria in goat milk.

## 310 **Conclusions**

311 This study describes the bacterial diversity in goat milk as well as in pasteurized goat  
312 milk during refrigerated storage. The analysis revealed the presence of bacteria that  
313 had not been previously been detected. Furthermore, high-throughput DNA  
314 sequencing revealed the presence of probiotic and pathogenic strains in goat milk.

315 This study also showed that microorganisms believed to be eliminated by  
316 pasteurization are likely to survive commercial pasteurization. Meanwhile, a  
317 Spearman's correlation analysis showed that some psychrophilic bacteria were  
318 positively correlated with *Sphingomonas* and *Meiothermus*; the effects of these  
319 microorganisms in goat milk remain unknown. Further studies should focus on the  
320 dynamic relationship between bacterial populations and goat milk composition as well  
321 as the isolation of beneficial bacteria from goat milk.

## 322 **Conflict of interest**

323 The authors declare that there is no commercial or associative interest that represents  
324 a conflict of interest in connection with the work submitted.

## 325 **Acknowledgements**

326 This study was supported by the Innovation Project of Guangxi Graduate Education  
327 (No. YCSW2018028). We thank LetPub ([www.letpub.com](http://www.letpub.com)) for its linguistic  
328 assistance during the preparation of this manuscript.

329

330

331 **References**

- 332 1. Angelidis, A. S., Tsiota, S., Pexara, A., Govaris, A., 2016. The microbiological  
333 quality of pasteurized milk sold by automatic vending machines. Letters in  
334 applied microbiology, 62(6), 472-479.
- 335 2. Arias, M., Cobo, M., Jaime-Sánchez, P., Pastor, J., Marijuan, P., Pardo, J., Del  
336 Campo, R., 2017. Gut microbiota and systemic inflammation changes after bread  
337 consumption: The ingredients and the processing influence. Journal of functional  
338 foods, 32, 98-105.
- 339 3. Callon, C., Duthoit, F., Delbès, C., Ferrand, M., Le Frileux, Y., De Crémoux, R.,  
340 Montel, M.C., 2007. Stability of microbial communities in goat milk during a  
341 lactation year: molecular approaches. Systematic and applied microbiology, 30(7),  
342 547-560.
- 343 4. Cavallarin, L., Giribaldi, M., de los Dolores Soto-Del, M., Valle, E., Barbarino,  
344 G., Gennero, M. S., Civera, T., 2015. A survey on the milk chemical and  
345 microbiological quality in dairy donkey farms located in NorthWestern Italy.  
346 Food Control, 50, 230-235.
- 347 5. Dalmaso, A., Civera, T., Bottero, M.T., 2017. Characterization of bacterial  
348 communities of donkey milk by high-throughput sequencing. International  
349 journal of food microbiology, 251, 67-72.
- 350 6. De Jonghe, V., Coorevits, A., Van Hoorde, K., Messens, W., Van Landschoot, A.,  
351 De Vos, P., Heyndrickx, M., 2011. Influence of storage conditions on the growth  
352 of *Pseudomonas* species in refrigerated raw milk. Appl. Environ. Microbiol, 77(2),



- 353 460-470.
- 354 7. Delbès-Paus, C., Pochet, S., Helinck, S., Veisseire, P., Bord, C., Lebecque, A.,  
355 Montel, M.C., 2012. Impact of Gram-negative bacteria in interaction with a  
356 complex microbial consortium on biogenic amine content and sensory  
357 characteristics of an uncooked pressed cheese. *Food microbiology*, 30(1), 74-82.
- 358 8. Doyle, C.J., Gleeson, D., O'Toole, P.W., Cotter, P.D., 2017. High-throughput  
359 metataxonomic characterization of the raw milk microbiota identifies changes  
360 reflecting lactation stage and storage conditions. *International journal of food  
361 microbiology*, 255, 1-6.
- 362 9. Edgar, R.C., 2013. UPARSE: highly accurate OTU sequences from microbial  
363 amplicon reads. *Nature methods*, 10(10), 996.
- 364 10. Ercolini, D., Russo, F., Ferrocino, I., Villani, F., 2009. Molecular identification of  
365 mesophilic and psychrotrophic bacteria from raw cow's milk. *Food  
366 Microbiology*, 26(2), 228-231.
- 367 11. Fadrosch, D.W., Ma, B., Gajer, P., Sengamalay, N., Ott, S., Brotman, R.M., Ravel,  
368 J., 2014. An improved dual-indexing approach for multiplexed 16S rRNA gene  
369 sequencing on the Illumina MiSeq platform. *Microbiome*, 2(1), 6.
- 370 12. Fernanda, P.D.S.F., Biscola, V., Leblanc, J. G., Dora, G.D.M.F.B., 2016. Effect of  
371 indigenous lactic acid bacteria isolated from goat milk and cheeses on folate and  
372 riboflavin content of fermented goat milk. *LWT - Food Science and Technology*,  
373 S0023643816301694.
- 374 13. Fonseca, C.R., Bordin, K., Fernandes, A.M., Rodrigues, C.E.C., Corassin, C.H.,

- 375 Cruz, A.G., 2013. Storage of refrigerated raw goat milk affecting the quality of  
376 whole milk powder. *Journal of Dairy Science*, 96(7), 4716-4724.
- 377 14. García, V., Rovira, S., Boutoial, K., López, M. B., 2014. Improvements in goat  
378 milk quality: A review. *Small Ruminant Research*, 121(1), 51-57.
- 379 15. Haenlein, G.F.W., 2004. Goat milk in human nutrition. *Small Ruminant Research*,  
380 51(2), 155-163.
- 381 16. Jeronimo-Ceneviva, A.B., de Paula, A.T., Silva, L.F., Todorov, S.D., Franco,  
382 B.D.G. M., & Penna, A.L.B., 2014. Probiotic properties of lactic acid bacteria  
383 isolated from water-buffalo mozzarella cheese. *Probiotics and antimicrobial*  
384 *proteins*, 6(3-4), 141-156.
- 385 17. Kable, M. E., Srisengfa, Y., Laird, M., Zaragoza, J., McLeod, J., Heidenreich, J.,  
386 Marco, M.L., 2016. The core and seasonal microbiota of raw bovine milk in  
387 tanker trucks and the impact of transfer to a milk processing facility. *MBio*, 7(4),  
388 e00836-16.
- 389 18. Kibbee, R.J., Örmeci, B., 2017. Development of a sensitive and false-positive  
390 free PMA-qPCR viability assay to quantify VBNC *Escherichia coli* and evaluate  
391 disinfection performance in wastewater effluent. *Journal of microbiological*  
392 *methods*, 132, 139-147.
- 393 19. Larpin-Laborde, S., Imran, M., Bonaiti, C., Bora, N., Gelsomino, R., Goerges, S.,  
394 Swings, J., 2011. Surface microbial consortia from Livarot, a French  
395 smear-ripened cheese. *Canadian Journal of Microbiology*, 57(8), 651-660.
- 396 20. Magoc, T., Salzberg, S., 2011. FLASH: Fast length adjustment of short reads to

- 397       impr ove genome assemblies. *Bioinformatics*. 27, 2957-2963.
- 398   21. McInnis, E.A., Kalanetra, K.M., Mills, D.A., Maga, E.A., 2015. Analysis of raw  
399       goat milk microbiota: impact of stage of lactation and lysozyme on microbial  
400       diversity. *Food Microbiology*, 46, 121-131.
- 401   22. Meunier-Goddik, L., Sandra, S. 2011. LIQUID MILK PRODUCTS | Liquid Milk  
402       Products: Pasteurized Milk. *Encyclopedia of Dairy Sciences*, 274–280.
- 403   23. Montel, M.C., Buchin, S., Mallet, A., Delbes-Paus, C., Vuitton, D.A., Desmasures,  
404       N., Berthier, F., 2014. Traditional cheeses: rich and diverse microbiota with  
405       associated benefits. *International journal of food microbiology*, 177, 136-154.
- 406   24. Neugebauer, K.A., Gilliland, S.E. 2005. Antagonistic action of *Lactobacillus*  
407       *delbrueckii* ssp. *lactis* RM2-5 toward spoilage Organisms in cottage cheese.  
408       *Journal of dairy science*, 88(4), 1335-1341.
- 409   25. Ottman, N., Reunanen, J., Meijerink, M., Pietilä, T.E., Kainulainen, V., Klievink,  
410       J., Satokari, R., 2017. Pili-like proteins of *Akkermansia muciniphila* modulate  
411       host immune responses and gut barrier function. *PLoS One*, 12(3), e0173004.
- 412   26. Park, Y.W., Juárez, M., Ramos, M., Haenlein, G.F.W., 2007. Physico-chemical  
413       characteristics of goat and sheep milk ☆. *Small Ruminant Research*, 68(1),  
414       88-113.
- 415   27. Paszyńska-Wesołowska, I., Bartoszcze, M., 2009. Bacteria in the state of  
416       VBNC-a threat to human health. *Medycyna Weterynaryjna*, 65(4), 228-231.
- 417   28. Perna, A., Intaglietta, I., Simonetti, A., Gambacorta, E., 2015. Donkey milk for  
418       manufacture of novel functional fermented beverages. *Journal of food science*,

- 419 80(6), S1352-S1359.
- 420 29. Petrus, R.R., Loiola, C.G., Oliveira, C.A.F., 2010. Microbiological shelf life of  
421 pasteurized milk in bottle and pouch. *Journal of food science*, 75(1), M36-M40.
- 422 30. Porcellato, D., Aspholm, M., Skeie, S. B., Monshaugen, M., Brendehaug, J.,  
423 Mellegård, H., 2018. Microbial diversity of consumption milk during processing  
424 and storage. *International journal of food microbiology*, 266, 21-30.
- 425 31. Quigley, L., O'Sullivan, O., Stanton, C., Beresford, T.P., Ross, R.P., Fitzgerald,  
426 G.F., Cotter, P.D., 2013. The complex microbiota of raw milk. *FEMS*  
427 *microbiology reviews*, 37(5), 664-698.
- 428 32. Raats, D., Offek, M., Minz, D., Halpern, M., 2011. Molecular analysis of  
429 bacterial communities in raw cow milk and the impact of refrigeration on its  
430 structure and dynamics. *Food microbiology*, 28(3), 465-471.
- 431 33. Reunanen, J., Kainulainen, V., Huuskonen, L., Ottman, N., Belzer, C., Huhtinen,  
432 H., Satokari, R., 2015. *Akkermansia muciniphila* adheres to enterocytes and  
433 strengthens the integrity of the epithelial cell layer. *Appl. Environ. Microbiol.*,  
434 81(11), 3655-3662.
- 435 34. Routy, B., Le Chatelier, E., Derosa, L., Duong, C.P., Alou, M.T., Daillère, R.,  
436 Fidelle, M., 2018. Gut microbiome influences efficacy of PD-1-based  
437 immunotherapy against epithelial tumors. *Science*, 359(6371), 91-97.
- 438 35. Scatamburlo, T.M., Yamazi, A.K., Cavicchioli, V.Q., Pieri, F.A., Nero, L.A. 2015.  
439 Spoilage potential of *Pseudomonas* species isolated from goat milk. *Journal of*  
440 *dairy science*, 98(2), 759-764.

- 441 36. Schloss, P.D., Westcott, S.L., Ryabin, T., Hall, J.R., Hartmann, M., Hollister, E.  
442 B., Sahl, J.W., 2009. Introducing mothur: open-source, platform-independent,  
443 community-supported software for describing and comparing microbial  
444 communities. *Appl. Environ. Microbiol.*, 75(23), 7537-7541.
- 445 37. Setyawardani, T., Rahayu, W.P., Maheswari, R., Palupi, N.H.S., 2011.  
446 Identification and characterization of probiotic lactic acid bacteria isolated from  
447 indigenous goat milk. *Animal Production*, 13(1).
- 448 38. Sokol, H., Seksik, P., Furet, J.P., Firmesse, O., Nion - Larmurier, I., Beaugerie, L.,  
449 Doré, J., 2009. Low counts of *Faecalibacterium prausnitzii* in colitis microbiota.  
450 *Inflammatory bowel diseases*, 15(8), 1183-1189.
- 451 39. Ternström, A., Lindberg, A.M., Molin, G. 1993. Classification of the spoilage  
452 flora of raw and pasteurized bovine milk, with special reference to *Pseudomonas*  
453 and *Bacillus*. *Journal of Applied Bacteriology*, 75(1), 25-34.
- 454 40. von Neubeck, M., Baur, C., Krewinkel, M., Stoeckel, M., Kranz, B., Stressler, T.,  
455 Wenning, M., 2015. Biodiversity of refrigerated raw milk microbiota and their  
456 enzymatic spoilage potential. *International journal of food microbiology*, 211,  
457 57-65.
- 458 41. Wang, Q., Garrity, G.M., Tiedje, J.M., Cole, J.R., 2007. Naive Bayesian classifier  
459 for rapid assignment of rRNA sequences into the new bacterial taxonomy. *Appl.*  
460 *Environ. Microbiol.*, 73(16), 5261-5267.
- 461 42. Zhang, F., Wang, Z., Lei, F., Wang, B., Jiang, S., Peng, Q., Shao, Y., 2017.  
462 Bacterial diversity in goat milk from the Guanzhong area of China. *Journal of*

463 dairy science, 100(10), 7812-7824.

464

465

466

467

468

469

470

471

472

473

474

475

476

477

478

479

480

481

482

483

484

485

486

487

488

489

490

491

WITHDRAWN  
see manuscript DOI for details

492 **Figure legends**

493 **Figure 1.** Rarefaction curve and rank abundance curve of bacterial diversity in goat  
494 milk. P<sub>5</sub>= pasteurized goat milk samples stored for 5 d at refrigeration temperature;  
495 P<sub>10</sub> = pasteurized goat milk samples stored for 10 d at refrigeration temperature. OTU  
496 = operational taxonomic units.

497 **Figure 2.** Relative abundance of the indigenous microflora (present above 0.1%)  
498 phyla (A) and genera (B) in raw goat milk.

499 **Figure 3.** Relative abundance of the microflora (present above 0.5%) at the genus  
500 level in pasteurized goat milk at refrigeration temperature. P<sub>5</sub> = pasteurized goat milk  
501 samples stored for 5 d. P<sub>10</sub> = pasteurized goat milk samples stored for 10 d.

502 **Figure 4.** Relative abundance of the Gram-positive and Gram-negative bacteria  
503 (present above 0.5%) at the genus level in pasteurized goat milk at refrigeration  
504 temperature. P<sub>5</sub> = pasteurized goat milk samples stored for 5 d. P<sub>10</sub> = pasteurized goat  
505 milk samples stored for 10 d.

506 **Figure 5.** Correlations among predominant bacterial genera of pasteurized goat milk  
507 during cold storage.

508 Table 1. Characteristics of high-throughput sequencing data

| Sample                       | Raw reads | Clean reads | Observed species | Chao   | Shannon | ACE    |
|------------------------------|-----------|-------------|------------------|--------|---------|--------|
| Raw milk                     | 374,136   | 356,787     | 551              | 562.25 | 3.09    | 556.35 |
| P <sub>5</sub> <sup>1</sup>  | 402,612   | 385,036     | 526              | 541.44 | 3.17    | 533.95 |
| P <sub>10</sub> <sup>2</sup> | 422,998   | 387,056     | 331              | 337.89 | 2.96    | 335.91 |

509 <sup>1</sup>P<sub>5</sub>= Pasteurized goat milk samples were stored for 5 d at refrigeration temperature.

510 <sup>2</sup>P<sub>10</sub>= Pasteurized goat milk samples were stored for 10 d at refrigeration temperature.

511

WITHDRAWN  
see manuscript DOI for details



512 Table 2. Prevalence of bacterial phyla and genera detected in raw goat milk by  
513 high-throughput sequencing

| Phylum                     | Mean  | Genus                | Mean  |
|----------------------------|-------|----------------------|-------|
| <i>Proteobacteria</i>      | 67.66 | <i>Kluyvera</i>      | 28.85 |
| <i>Firmicutes</i>          | 18.56 | <i>Geobacillus</i>   | 9.30  |
| <i>Deinococcus-Thermus</i> | 8.50  | <i>Thermus</i>       | 8.49  |
| <i>Bacteroidetes</i>       | 3.30  | <i>Pseudomonas</i>   | 8.28  |
|                            |       | <i>Acinetobacter</i> | 4.08  |
|                            |       | <i>Shigella</i>      | 1.93  |
|                            |       | <i>Aquabacterium</i> | 1.02  |
|                            |       | <i>Burkholderia</i>  | 1.18  |
|                            |       | <i>Streptococcus</i> | 1.06  |

514

515

WITHDRAWN  
see manuscript DOI for details

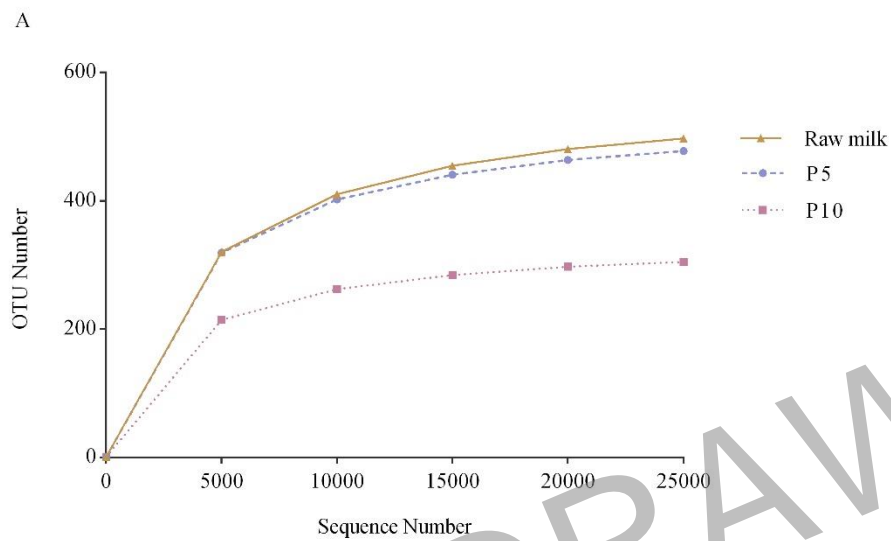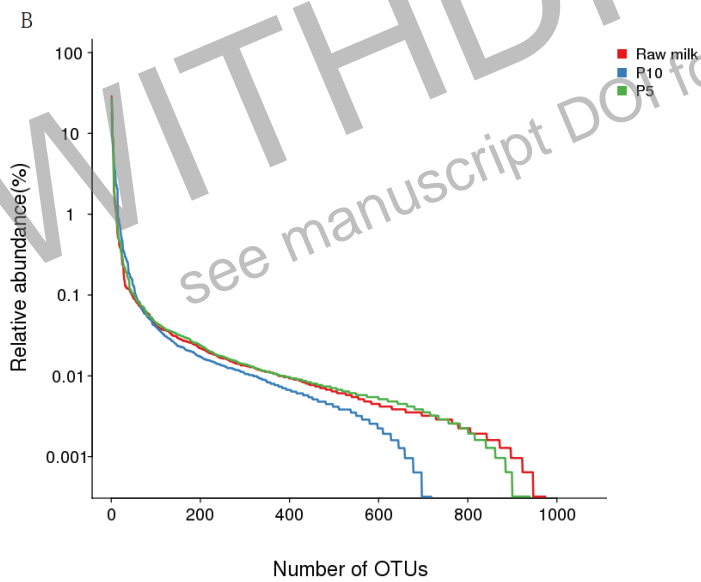

Figure 1.

516

517

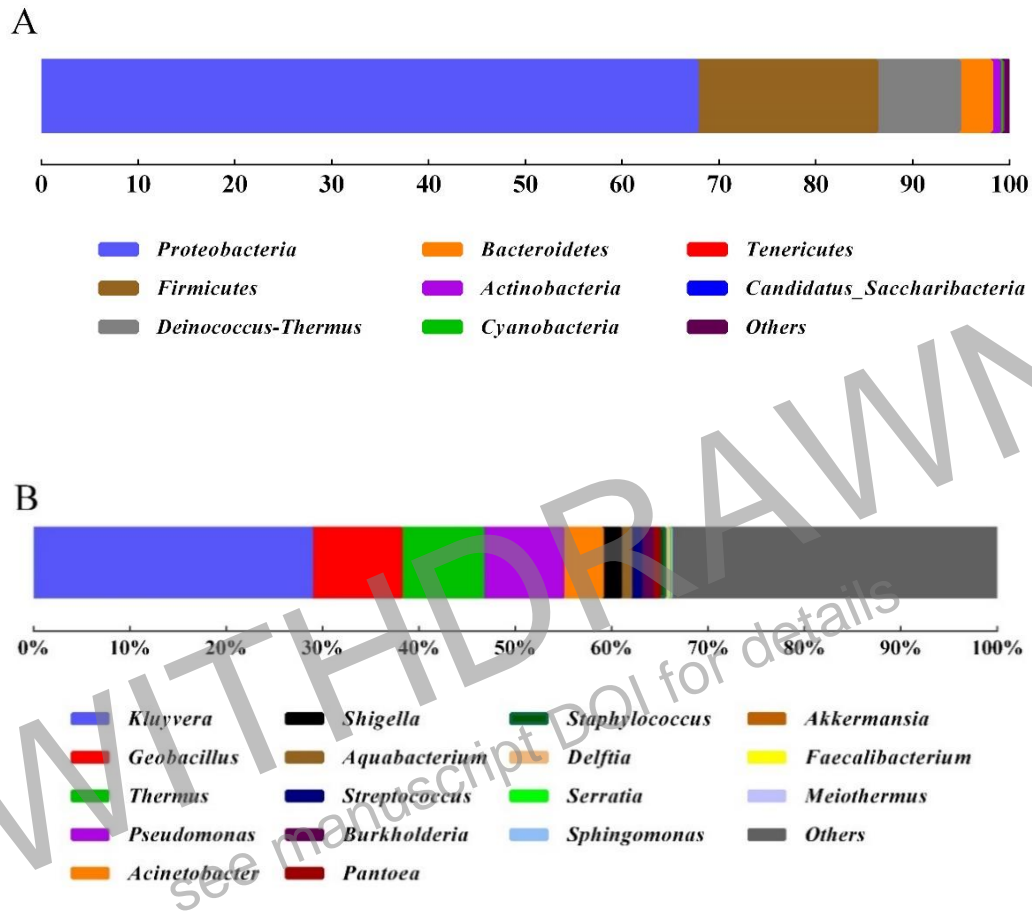

Figure 2.

518

519

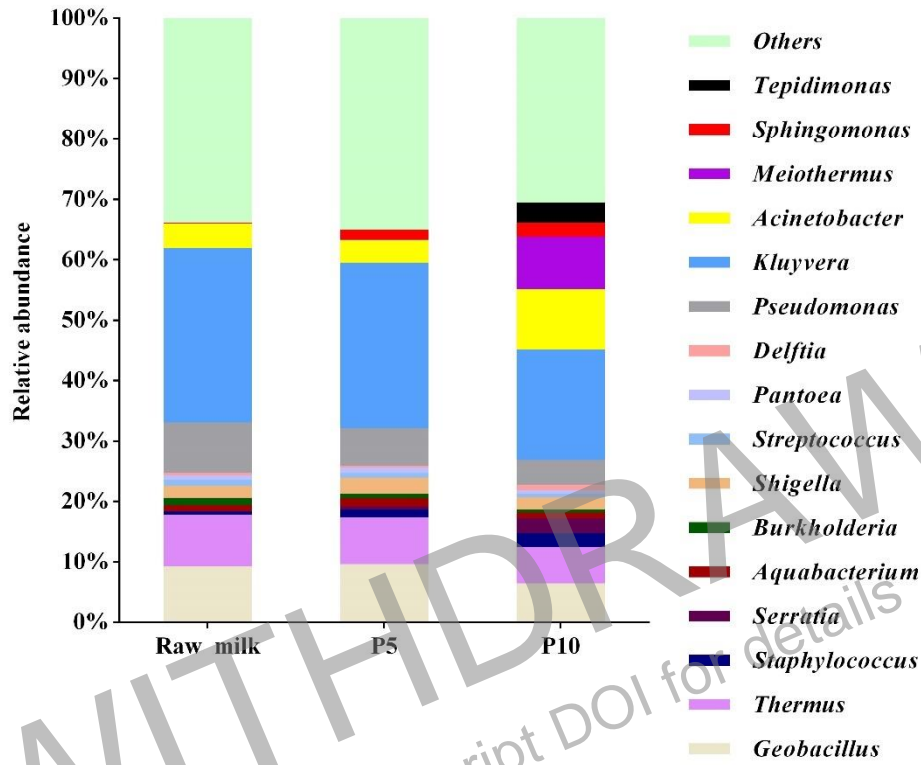

Figure 3.

520

521

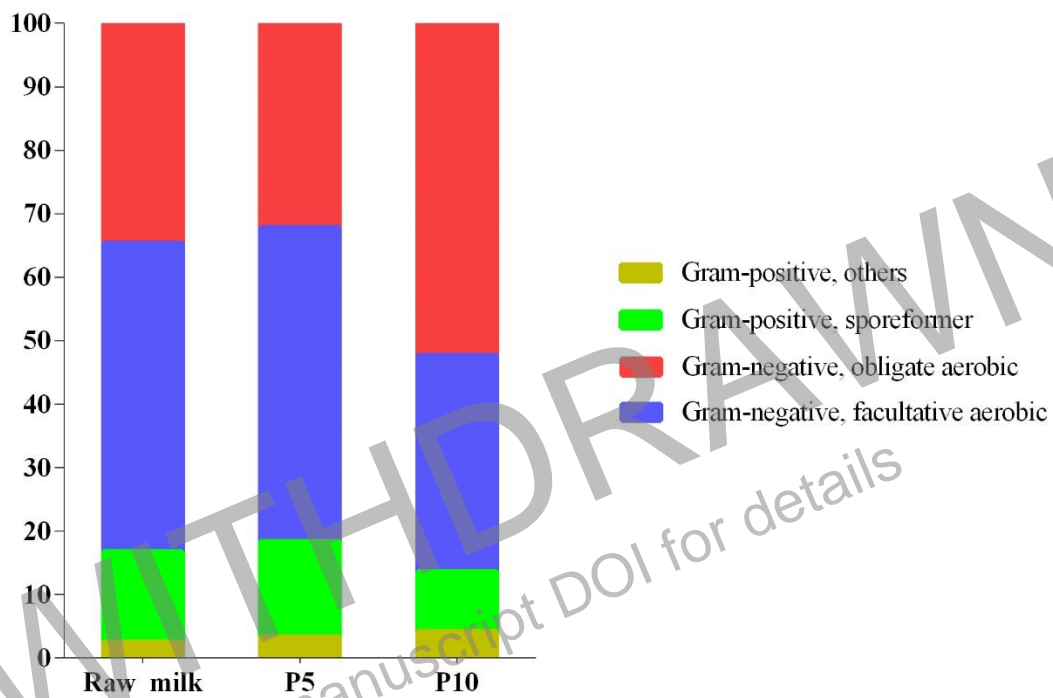

Figure 4.

522

523

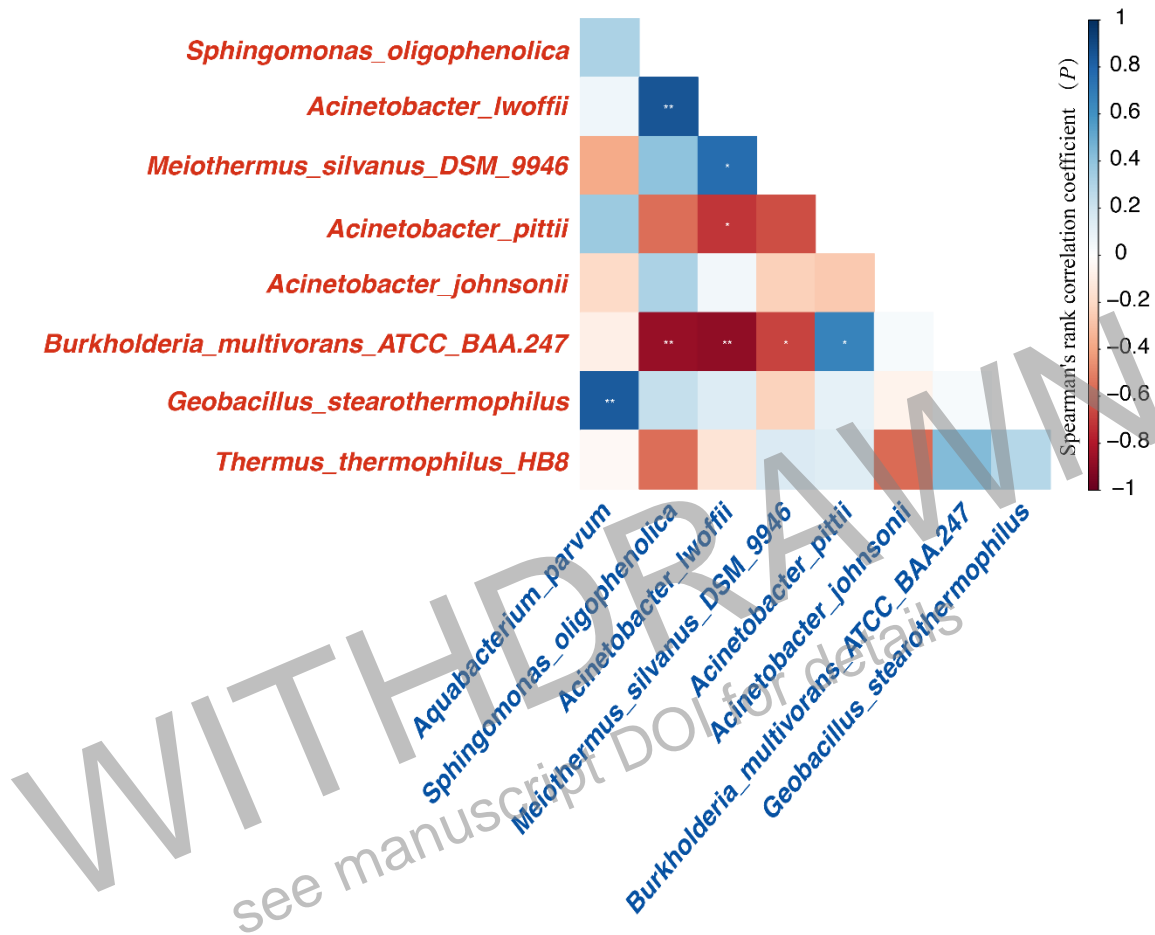

Figure 5.

524

525
